# Supplementary material for: Assessment of coronary artery disease during hospitalization for cancer treatment
Source: Springer Nature journal article supplement (doi:10.1007/s00392-020-01719-5), 2020-08-02
Supplement: MOESM1 [file 18240360]

## Assessment of coronary artery disease during hospitalization for cancer treatment

Simone M. Mrotzek<sup>1</sup>, Alessia Lena<sup>2,3,4,5</sup>, Sara Hadzibegovic<sup>2,3,4,5</sup>, Ria Ludwig<sup>1</sup>, Fadi Al-Rashid<sup>1</sup>, Amir A. Mahabadi<sup>1</sup>, Raluca I. Mincu<sup>1</sup>, Lars Michel<sup>1</sup>, Laura Johannsen<sup>1</sup>, Lena Hinrichs<sup>1</sup>, Martin Schuler<sup>6,7</sup>, Ulrich Keller<sup>8</sup>, Stefan D. Anker<sup>2,4,5</sup>, Ulf Landmesser<sup>3,4,5</sup>, Tienush Rassaf<sup>1</sup>, Markus S. Anker<sup>2,3,4,5</sup>, Matthias Totzeck<sup>1</sup>

<sup>1</sup>Department of Cardiology and Vascular Medicine, West German Heart and Vascular Center, Medical Faculty, University Hospital Essen Hufelandstr. 55, 45147 Essen, Germany

<sup>2</sup>Division of Cardiology and Metabolism, Department of Cardiology, Charité Campus Virchow Klinikum (CVK), Berlin, Germany

<sup>3</sup>Department of Cardiology, Charité Campus Benjamin Franklin (CBF), Berlin, Germany

<sup>4</sup>Berlin Institute of Health Center for Regenerative Therapies (BCRT), Berlin, Germany

<sup>5</sup>DZHK (German Center for Cardiovascular Research), partner site Berlin, Germany

<sup>6</sup>Department of Medical Oncology, West German Cancer Center, Medical Faculty, University Hospital Essen, Hufelandstr. 55, 45147 Essen, Germany

<sup>7</sup>German Cancer Consortium (DKTK), Partner site University Hospital Essen, Hufelandstrasse 55, 45147 Essen, Germany

<sup>8</sup>Department of Hematology, Oncology and Tumor Immunology, Charité Campus Benjamin Franklin (CBF), Berlin, Germany

### Corresponding author:

Dr. Matthias Totzeck

Department for Cardiology and Vascular Medicine

West German Heart and Vascular Center

Medical Faculty, University Hospital Essen

Hufelandstraße 55, 45147 Essen, Germany

Phone: +49 201 723 4818

Fax: +49 201 723 5401

[Matthias.Totzeck@uk-essen.de](mailto:Matthias.Totzeck@uk-essen.de)

**Supplemental fig. 1**

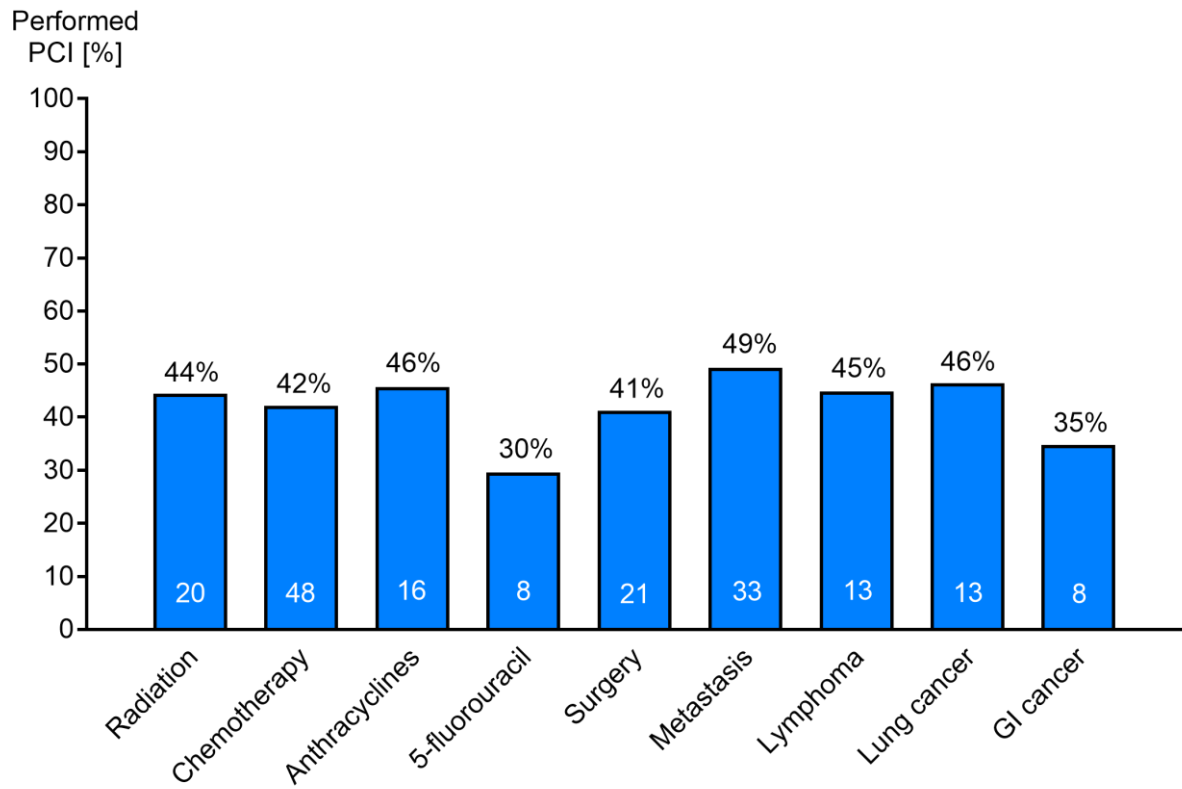

Rate of performed primary percutaneous coronary intervention (PCI) related to cancer therapy and entity showing no significant differences between groups.

Supplemental fig. 2

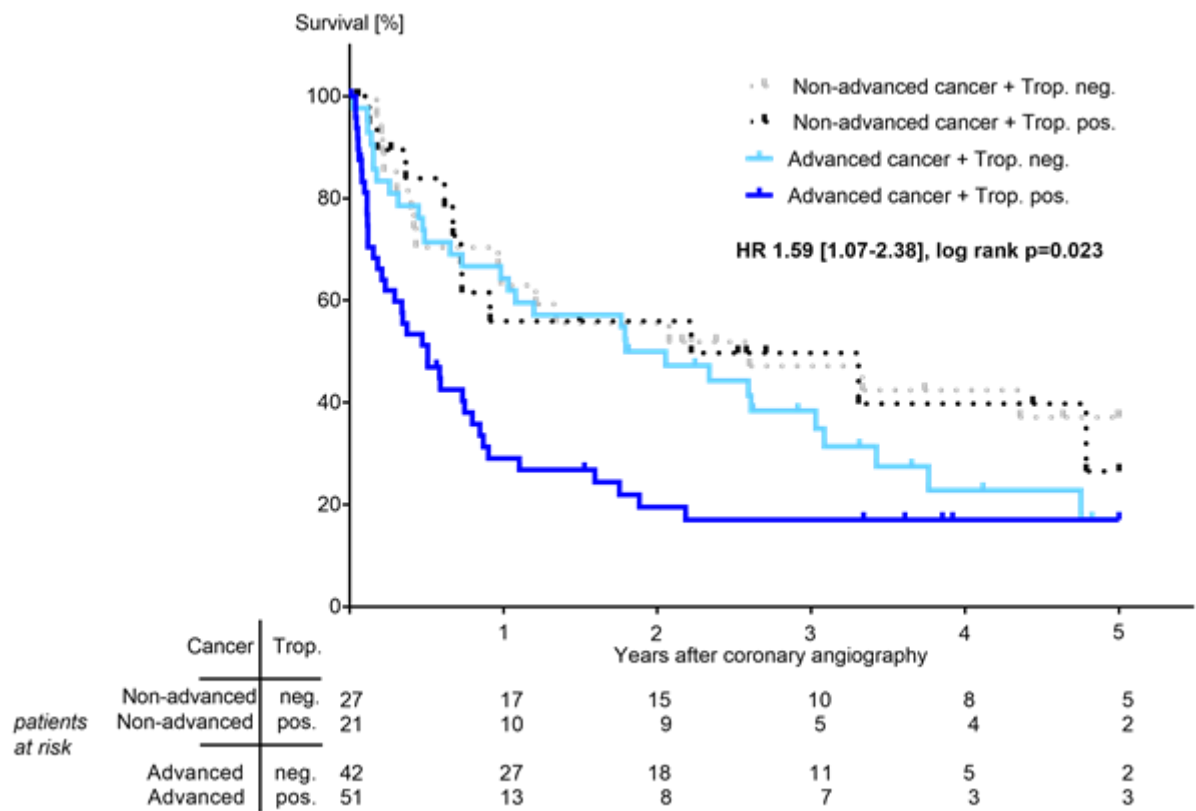

Five year all-cause mortality of cancer patients divided in advanced and non-advanced cancer with troponin positive acute coronary syndrome (trop. pos./ STEMI and NSTEMI) or troponin negative angina (trop. neg./ unstable and stable angina). Patients with advanced cancer presented with trop. pos. ACS had the highest mortality, log rank (Mantel Cox) p=0.023.

**Supplemental table 1**

Baseline characteristics of cancer patients with troponin-positive acute coronary syndrome (trop. pos.) vs. troponin-negative angina (trop. neg.)

|                                                   | <b>Cancer +<br/>Trop. neg.<br/>(n=77)</b> | <b>Cancer +<br/>Trop. pos.<br/>(n=76)</b> | <b>P value</b> |
|---------------------------------------------------|-------------------------------------------|-------------------------------------------|----------------|
| <b>Age, years</b>                                 | 67.1 (± 11.4)                             | 64.42 (± 11.5)                            | 0.160          |
| <b>Male sex, n (%)</b>                            | 55 (71.4)                                 | 57 (75)                                   | 0.716          |
| <b>BMI, kg/m<sup>2</sup></b>                      | 26.4 (± 4.8)                              | 25.6 (± 4.8)                              | 0.300          |
| <b>Vascular risk factors, n (%)</b>               |                                           |                                           |                |
| <b>Diabetes mellitus</b>                          | 19 (24.7)                                 | 18 (23.7)                                 | 1.000          |
| <b>Smoking</b>                                    | 30 (39.0)                                 | 32 (42.1)                                 | 0.743          |
| <b>Hypertension</b>                               | 63 (81.8)                                 | 58 (76.3)                                 | 0.432          |
| <b>Dyslipidemia</b>                               | 37 (48.1)                                 | 37 (48.7)                                 | 1.000          |
| <b>Medical history, n (%)</b>                     |                                           |                                           |                |
| <b>Coronary artery disease</b>                    | 32 (41.6)                                 | 24 (31.6)                                 | 0.241          |
| <b>Atrial fibrillation</b>                        | 23 (29.9)                                 | 16 (21.1)                                 | 0.266          |
| <b>PAOD</b>                                       | 8 (10.4)                                  | 11 (14.5)                                 | 0.473          |
| <b>CAOD</b>                                       | 2 (2.6)                                   | 6 (7.9)                                   | 0.167          |
| <b>Stroke</b>                                     | 3 (3.9)                                   | 9 (11.8)                                  | 0.079          |
| <b>COPD</b>                                       | 15 (19.5)                                 | 17 (22.4)                                 | 0.695          |
| <b>Laboratory findings</b>                        |                                           |                                           |                |
| <b>Creatinine, mg/dl</b>                          | 1.03 (0.77-1.32)                          | 1.08 (0.86-1.26)                          | 0.900          |
| <b>GFR &lt;60 ml/min/1.73m<sup>2</sup>, n (%)</b> | 33 (42.9)                                 | 29 (38.2)                                 | 0.622          |
| <b>Hb, g/dl</b>                                   | 11.1 (± 1.7)                              | 10.6 (± 1.9)                              | 0.300          |
| <b>Platelet count, /nl</b>                        | 221 (174-282)                             | 215 (152-277)                             | 0.600          |
| <b>Reduced EF (&lt;40%), n (%)</b>                | 11 (14.7)                                 | 16 (23.2)                                 | 0.207          |
| <b>Medication history, n (%)</b>                  |                                           |                                           |                |
| <b>Acetylsalicylic acid</b>                       | 39 (50.6)                                 | 31 (40.8)                                 | 0.257          |
| <b>Dual antiplatelet therapy</b>                  | 11 (14.3)                                 | 4 (5.3)                                   | 0.100          |
| <b>Anticoagulation</b>                            | 8 (10.4)                                  | 6 (7.9)                                   | 0.780          |
| <b>Statin use</b>                                 | 24 (31.2)                                 | 20 (26.3)                                 | 0.593          |
| <b>Beta-blockers</b>                              | 52 (67.5)                                 | 45 (59.2)                                 | 0.317          |

*BMI* body mass index, *PAOD* peripheral artery occlusive disease, *CAOD* cerebral artery occlusive disease, *COPD* chronic obstructive pulmonary disease, *GFR* glomerular filtration rate, *Hb* hemoglobin, *EF* ejection fraction

Data is shown as mean (± SD) or median (IQR)

**Supplemental table 2**

Results of cardiac catheter examinations in Cancer patients with troponin-positive acute coronary syndrome (trop. pos.) vs. troponin-negative angina (trop. neg.)

|                                                     | <b>Cancer +<br/>Trop. neg.<br/>(n=77)</b> | <b>Cancer +<br/>Trop. pos.<br/>(n=76)</b> | <b>P value</b> |
|-----------------------------------------------------|-------------------------------------------|-------------------------------------------|----------------|
| <b>Findings, n (%)</b>                              |                                           |                                           |                |
| <b>Multivessel disease</b>                          | 37 (48.1)                                 | 44 (57.9)                                 | 0.258          |
| <b>Absence of CAD</b>                               | 26 (33.8)                                 | 18 (23.7)                                 | 0.212          |
| <b>CTO</b>                                          | 11 (14.3)                                 | 18 (23.7)                                 | 0.154          |
| <b>LMCA stenosis</b>                                | 7 (9.1)                                   | 11 (14.5)                                 | 0.327          |
| <b>Culprit lesion</b>                               | 33 (42.9)                                 | 41 (53.9)                                 | 0.197          |
| <b>Small vessel disease</b>                         | 31 (40.3)                                 | 34 (44.7)                                 | 0.625          |
| <b>PCI (any)</b>                                    | 25 (32.5)                                 | 37 (48.7)                                 | 0.049*         |
| <b>DES</b>                                          | 12 (15.6)                                 | 26 (34.2)                                 | 0.009*         |
| <b>BMS</b>                                          | 11 (14.3)                                 | 13 (17.1)                                 | 0.663          |
| <b>SYNTAX-score<sup>†</sup></b>                     |                                           |                                           |                |
| <b>Baseline-Score</b>                               | 2 (0-7)                                   | 7 (0-15.25)                               | <0.001*        |
| <b>Lowest tertile (<math>\leq 22</math>), n (%)</b> | 66 (97.1)                                 | 56 (83.6)                                 | 0.009*         |
| <b>Intermediate tertile (23-32)</b>                 | 2 (2.9)                                   | 7 (10.4)                                  | 0.096          |
| <b>Highest tertile (<math>\geq 33</math>)</b>       | 0                                         | 4 (6.0)                                   | 0.058          |
| <b>Score post PCI<sup>‡</sup></b>                   | 0 (0)                                     | 2 (0-2)                                   | 0.170          |
| <b>Residual score &gt;8, n (%)</b>                  | 8 (11.8)                                  | 12 (17.9)                                 | 0.343          |
| <b>LVEDP<sup>§</sup>, mmHg</b>                      | 13 (5.25-16)                              | 15 (7-22.75)                              | 0.158          |

*CAD* coronary artery disease, *CTO* chronic total occlusion, *LMCA* left main coronary artery, *PCI* percutaneous coronary intervention, *DES* drug eluting stent, *BMS* bare metal stent, *SYNTAX* SYnergy between PCI with TAXus and cardiac surgery, *LVEDP* left ventricular end-diastolic pressure

Data is shown as median (IQR)

\*Statistically significant difference between Trop. neg. vs. Trop. pos. cancer patients

<sup>†</sup>excluded patients with history for coronary artery bypass surgery, included: Cancer + Trop. neg. n=68, Cancer + Trop pos. n=67

<sup>‡</sup>patients with performed PCI: Cancer + Trop. neg. n=21, Cancer + Trop pos. n=37

<sup>§</sup> documented LVEDP: Cancer + Trop. neg. n=57, Cancer + Trop pos. n=53
